# Supplementary material for: Measurement of NO x and NO y with a thermal dissociation cavity ring-down spectrometer (TD-CRDS): instrument characterisation and first deployment
Source: Copernicus journal article supplement (doi:10.5194/amt-13-5739-2020), 2020-10-29
Supplement: Supplementary file 1 [file amt-13-5739-2020-supplement.pdf]

Supplement of Atmos. Meas. Tech., 13, 5739–5761, 2020  
<https://doi.org/10.5194/amt-13-5739-2020-supplement>  
© Author(s) 2020. This work is distributed under  
the Creative Commons Attribution 4.0 License.

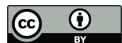

*Supplement of*

**Measurement of  $\text{NO}_x$  and  $\text{NO}_y$  with a thermal dissociation  
cavity ring-down spectrometer (TD-CRDS): instrument  
characterisation and first deployment**

**Nils Friedrich et al.**

*Correspondence to:* John N. Crowley ([john.crowley@mpic.de](mailto:john.crowley@mpic.de))

The copyright of individual parts of the supplement might differ from the CC BY 4.0 License.

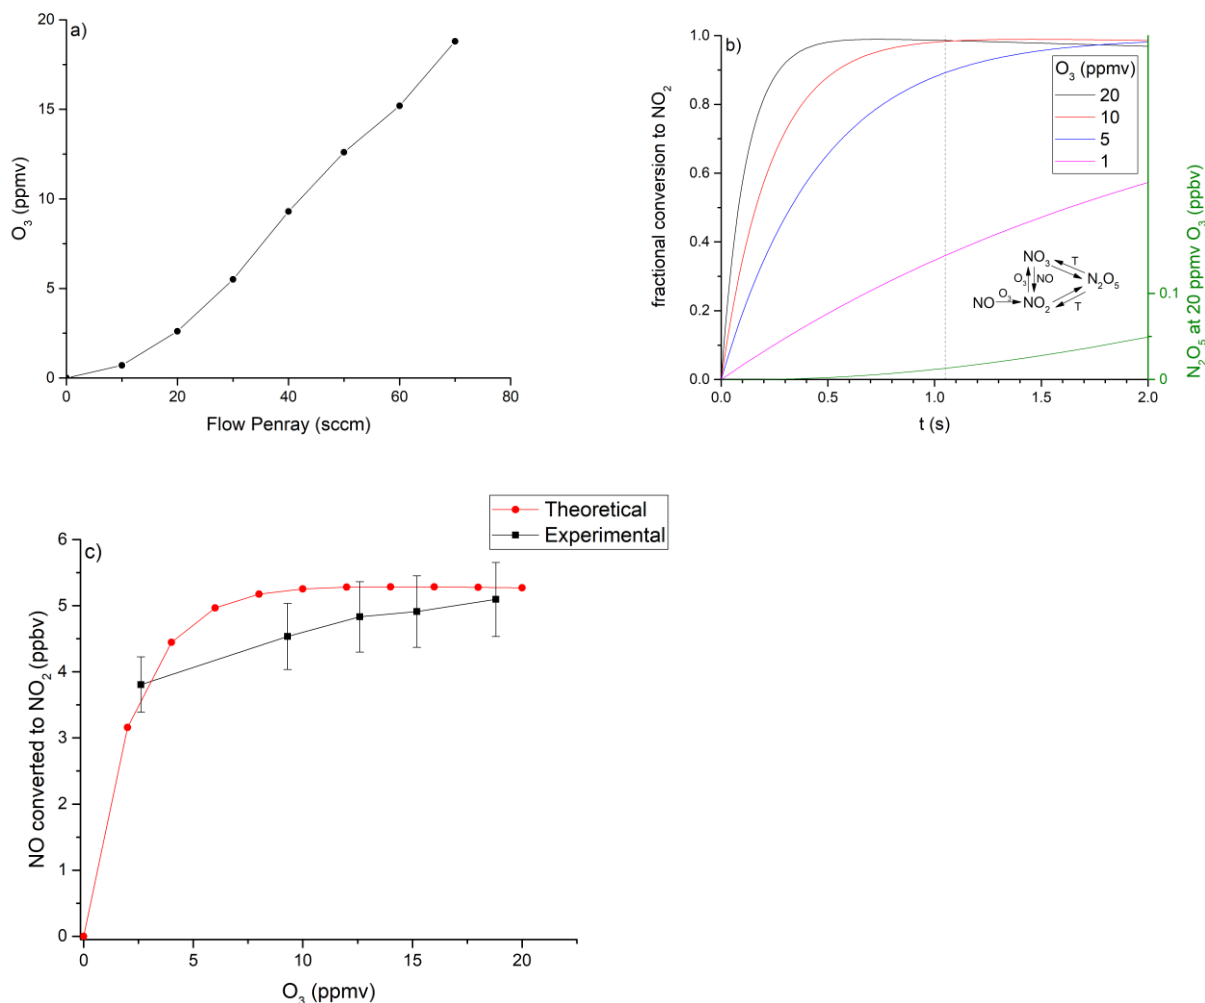

**Figure S1:** Optimisation of NO to NO<sub>2</sub> conversion via the addition of O<sub>3</sub>. *a)* Ozone generated by passing synthetic air over the Pen-Ray lamp as a function of the flow rate. *b)* Numerical simulation of the fractional NO conversion as a function of reaction time and a chemical scheme showing reactions included in the model. High concentrations of O<sub>3</sub> can lead to the formation of significant amounts of N<sub>2</sub>O<sub>5</sub> (50 pptv at 20 ppmv O<sub>3</sub> and 2 s reaction time). *c)* Conversion of 5.3 ppbv NO to NO<sub>2</sub> as a function of O<sub>3</sub> in 1.05 s reaction time. Both laboratory results and predictions of a numerical simulation are shown. Quantitative conversion is achieved for O<sub>3</sub> concentrations above 15 ppmv. The error bars indicate total overall uncertainty.

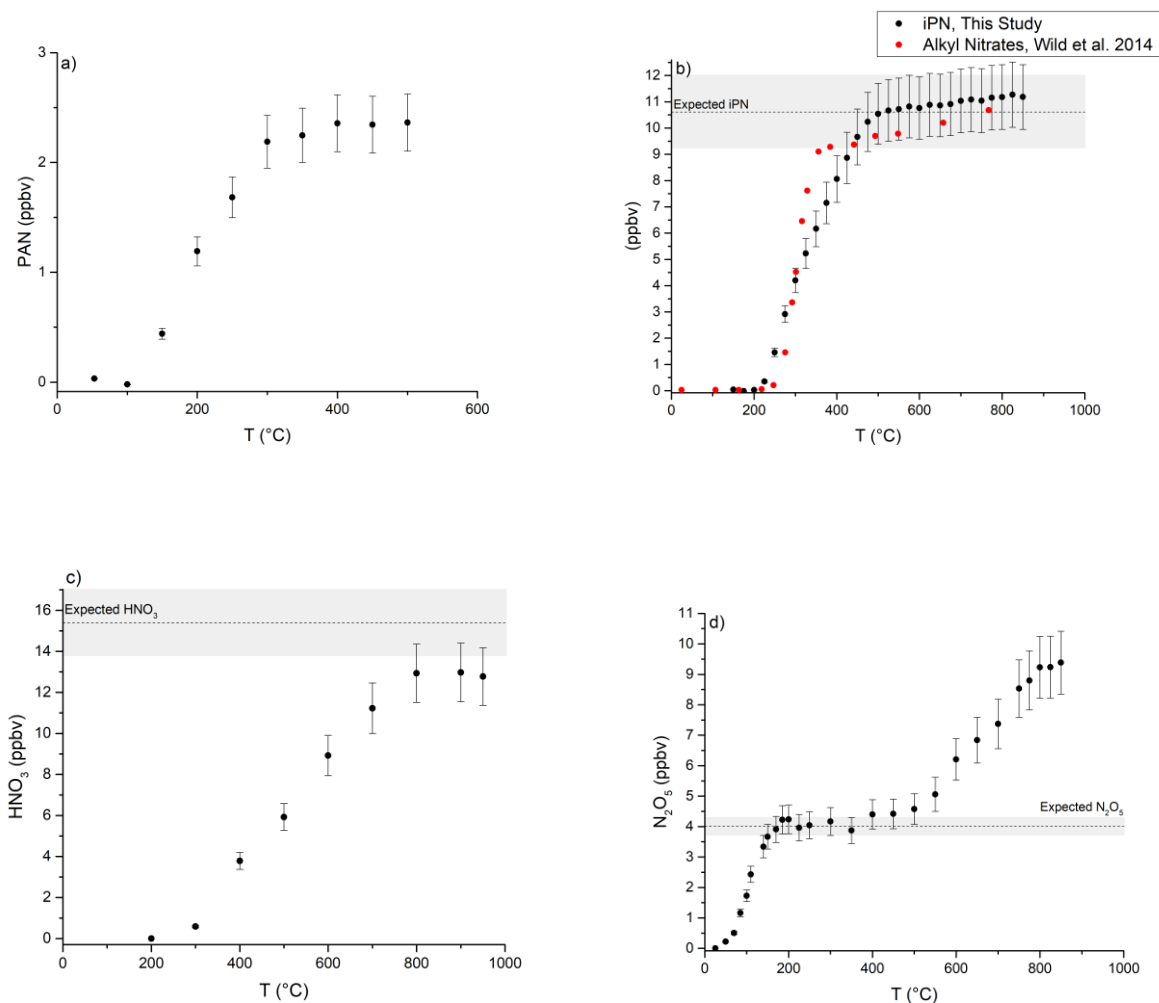

**Figure S2:** Absolute thermograms of PAN (a), iPN (b), HNO<sub>3</sub> (c), and N<sub>2</sub>O<sub>5</sub> (d). Error bars represent the measurement  
 5 uncertainty (see Sect. 2.2). Shaded areas show the estimated uncertainty ranges for the expected iPN and HNO<sub>3</sub> concentrations, based on errors during sample preparation and gas stream dilution. Within combined uncertainties we observe quantitative conversion of PAN, iPN, 2x N<sub>2</sub>O<sub>5</sub> and HNO<sub>3</sub> to NO<sub>2</sub> at the TD-CRDS set temperature of 850 °C. (b) also includes data points for an alkyl nitrates mixtures from Wild et al. (2014), to illustrate the continuous increases in signal above 400 °C.

10 Wild, R. J., Edwards, P. M., Dube, W. P., Baumann, K., Edgerton, E. S., Quinn, P. K., Roberts, J. M., Rollins, A. W., Veres, P. R., Warneke, C., Williams, E. J., Yuan, B., and Brown, S. S.: A measurement of total reactive nitrogen, NO<sub>y</sub>, together with NO<sub>2</sub>, NO, and O<sub>3</sub> via cavity ring-down spectroscopy, *Env. Sci. Tech.*, 48, 9609-9615, doi:doi:10.1021/es501896w, 2014

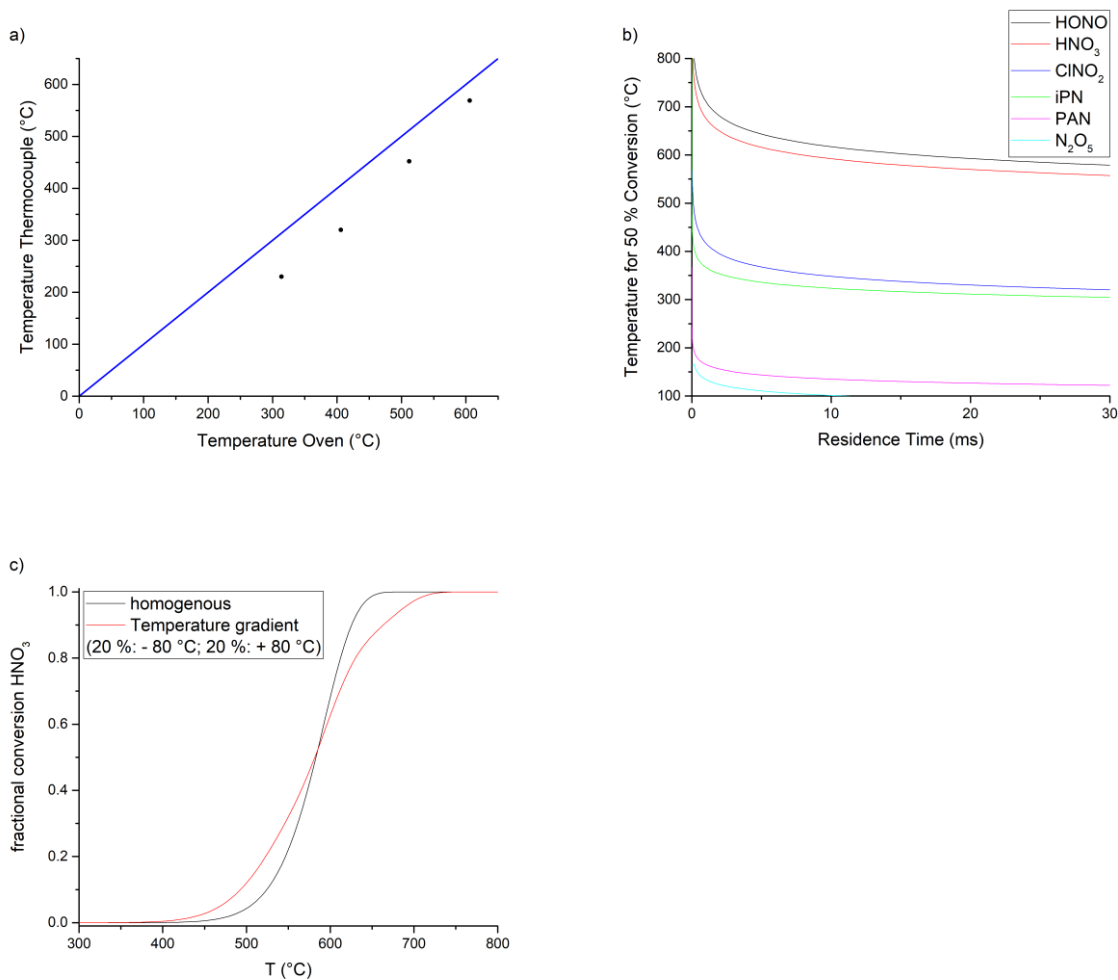

5 **Figure S3:** a) Plot of temperature from the internal reading of the TD-oven and a thermocouple located in the gas stream. The blue line shows a 1:1 correlation. b) Calculated threshold temperature for 50% conversion of N<sub>2</sub>O<sub>5</sub>, PAN, iPN, ClNO<sub>2</sub>, HNO<sub>3</sub> and HONO to NO<sub>x</sub> relative to the residence time in the heated inlet and based on kinetic parameters of their thermal dissociation (see Sect. 3.1.8). For HNO<sub>3</sub>, the threshold temperature increases by 40 °C when the residence time decreases from 30 to 10 ms. c) Impact of temperature gradients inside the TD-inlet on the shape of the calculated HNO<sub>3</sub> thermogram. The width of the thermogram increases by ca. 100 °C.

10

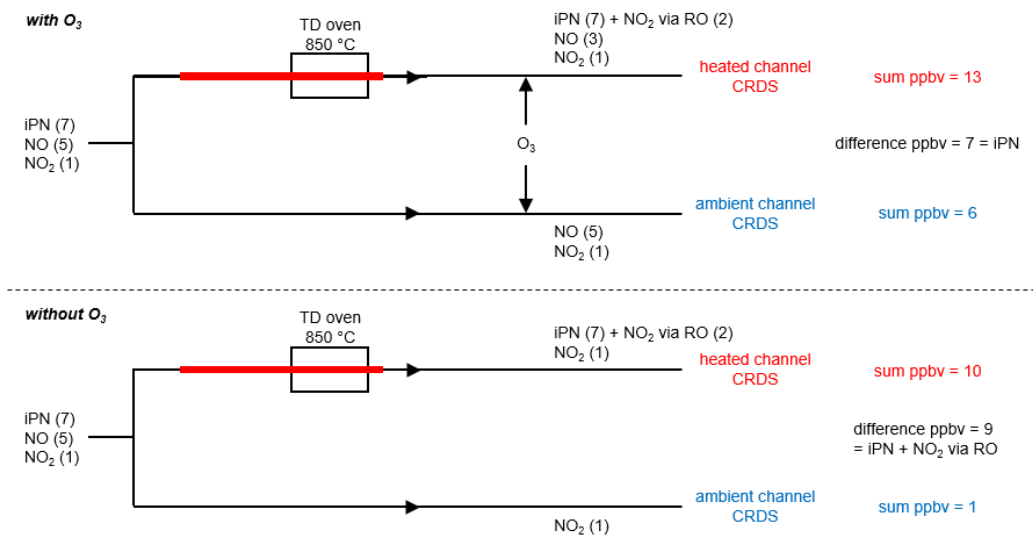

**Figure S4:** Graphical representation of the bias caused by  $\text{RO}_2 + \text{NO}$  reactions in detecting iPN. In both cases an initial mixing ratio of 7 ppbv iPN is present, along with 5 ppbv NO and 1 ppbv  $\text{NO}_2$ . When passed through the oven the iPN is converted to 7 ppbv  $\text{NO}_2$  and (in this scenario) 2 ppbv of NO are converted to  $\text{NO}_2$  via reaction with  $\text{HO}_2$ . In total 13 ppbv of  $\text{NO}_2$  are detected in the cavity sampling via the oven. In the cavity at ambient temperature 6 ppbv of  $\text{NO}_2$  are detected so that a (correct) iPN mixing ratio of 7 ppbv is derived. In the lower part of the figure, the same initial conditions apply, but  $\text{O}_3$  is not added. The conversion of 2 ppbv NO to  $\text{NO}_2$  occurs as above, so that 10 ppbv  $\text{NO}_2$  are detected when sampling from the oven. The  $\text{NO}_2$  mixing ratio in the cavity sampling at ambient is 1 ppbv, resulting in a derived (incorrect)  $\text{NO}_2$  iPN mixing ratio of 9 ppbv.

15

20

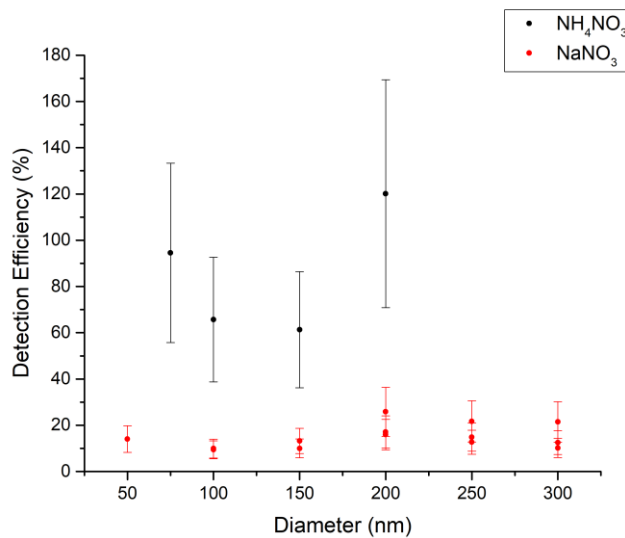

**Figure S5:** Detection efficiencies of NH<sub>4</sub>NO<sub>3</sub> and NaNO<sub>3</sub> in the TD-CRDS, as a function of particle diameter. The CPC  
 5 measured particle numbers were converted to mixing ratios and compared to the TD-CRDS. Errors inherent for this method  
 are explained in Sect. 3.1.7. The particle conversion to NO<sub>2</sub> is clearly more efficient for NH<sub>4</sub>NO<sub>3</sub>, in direct comparison to  
 NaNO<sub>3</sub>.

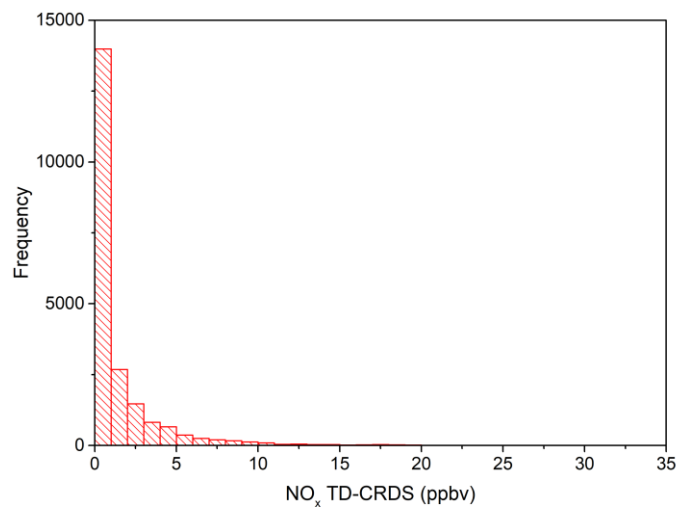

**Figure S6:** Histogram of the AQABA TD-CRDS NO<sub>x</sub> mixing ratios shown in Fig. 10a). 92 % of the NO<sub>x</sub> data points were at mixing ratios below 5 ppbv.

5

**Table S1:** Reactions included in the numerical simulations used to generate Fig. S1.

| Reaction                                                        | Rate coefficients (Burkholder et al. (2015))                                                                                                                                                                                                                                                                             |
|-----------------------------------------------------------------|--------------------------------------------------------------------------------------------------------------------------------------------------------------------------------------------------------------------------------------------------------------------------------------------------------------------------|
| $\text{NO}_2 + \text{O}_3 \rightarrow \text{NO}_3 + \text{O}_2$ | $1.2\text{E-}13 \cdot \exp(-2450/T)$                                                                                                                                                                                                                                                                                     |
| $\text{NO} + \text{NO}_3 \rightarrow \text{NO}_2 + \text{NO}_2$ | $1.5\text{E-}11 \cdot \exp(170/T)$                                                                                                                                                                                                                                                                                       |
| $\text{NO} + \text{O}_3 \rightarrow \text{NO}_2 + \text{O}_2$   | $3.0\text{E-}12 \cdot \exp(-1500/T)$                                                                                                                                                                                                                                                                                     |
| $\text{N}_2\text{O}_5 \rightarrow \text{NO}_3 + \text{NO}_2$    | $((2.0\text{E-}30 \cdot (T/300)^{-4.4} \cdot M / (1 + ((2.0\text{E-}30 \cdot (T/300)^{-4.4} \cdot M / (1.4\text{E-}12 \cdot (T/300)^{-0.7})))) \cdot 0.6^{(1 + (\text{LOG}_{10}((2.0\text{E-}30 \cdot (T/300)^{-4.4} \cdot M / (1.4\text{E-}12 \cdot (T/300)^{-0.7})))^2)^{-1})) / (3.0\text{E-}27 \cdot \exp(10990/T))$ |
| $\text{NO}_2 + \text{NO}_3 \rightarrow \text{N}_2\text{O}_5$    | $((2.0\text{E-}30 \cdot (T/300)^{-4.4} \cdot M / (1 + ((2.0\text{E-}30 \cdot (T/300)^{-4.4} \cdot M / (1.4\text{E-}12 \cdot (T/300)^{-0.7})))) \cdot 0.6^{(1 + (\text{LOG}_{10}((2.0\text{E-}30 \cdot (T/300)^{-4.4} \cdot M / (1.4\text{E-}12 \cdot (T/300)^{-0.7})))^2)^{-1}))$                                        |

M = molecular density in molecule  $\text{cm}^{-3}$ , T = temperature in K.

- 5 *Burkholder, J. B., Sander, S. P., Abbatt, J., Barker, J. R., Huie, R. E., Kolb, C. E., Kurylo, M. J., Orkin, V. L., Wilmouth, D. M., and Wine, P. H.: Chemical Kinetics and Photochemical Data for Use in Atmospheric Studies, Evaluation No. 18, "JPL Publication 15-10, Jet Propulsion Laboratory, Pasadena, <http://jpldataeval.jpl.nasa.gov>, 2015.*



**Table S2:** Denuder characterisation

| <b>NO<sub>y</sub> species</b> | <b>RH (%)</b> | <b>Reference mixing ratio (pptv) = I<sub>0</sub> ± ΔI<sub>0</sub></b> | <b>Mixing ratio with denuder (pptv) = I ± ΔI</b> | <b>Removal efficiency (%) = (R ± ΔR) x 100</b> |
|-------------------------------|---------------|-----------------------------------------------------------------------|--------------------------------------------------|------------------------------------------------|
| NO                            | 0             | 37036 ± 261                                                           | 0 ± 43                                           | 100.0 ± 1.0                                    |
|                               | 14            |                                                                       | 62 ± 46                                          | 99.8 ± 1.0                                     |
|                               | 28            |                                                                       | 832 ± 94                                         | 97.8 ± 1.0                                     |
|                               | 42            |                                                                       | 7832 ± 60                                        | 78.9 ± 0.9                                     |
|                               | 55            |                                                                       | 10391 ± 65                                       | 71.9 ± 0.9                                     |
|                               | 68            |                                                                       | 12575 ± 45                                       | 66.0 ± 0.9                                     |
|                               | 81            |                                                                       | 13758 ± 51                                       | 62.9 ± 0.8                                     |
|                               | 97            |                                                                       | 14220 ± 74                                       | 61.6 ± 0.9                                     |
| iPN                           | 0             | 20181 ± 247                                                           | 0 ± 22                                           | 100.0 ± 1.0                                    |
|                               | 14            |                                                                       | -98 ± 91                                         | 100.5 ± 1.0                                    |
|                               | 27            |                                                                       | -65 ± 58                                         | 100.3 ± 1.0                                    |
|                               | 41            |                                                                       | 355 ± 49                                         | 98.2 ± 0.9                                     |
|                               | 55            |                                                                       | 303 ± 41                                         | 98.5 ± 0.9                                     |
|                               | 68            |                                                                       | 537 ± 47                                         | 97.3 ± 0.9                                     |
|                               | 81            |                                                                       | 907 ± 46                                         | 95.5 ± 0.8                                     |
|                               | 95            |                                                                       | 1043 ± 33                                        | 94.8 ± 0.9                                     |
| HNO <sub>3</sub>              | 0             | 8224 ± 214                                                            | 35 ± 58                                          | 99.6 ± 2.7                                     |
|                               | 68            | 9104 ± 173                                                            | 247 ± 50                                         | 97.3 ± 3.7                                     |
| NO <sub>2</sub>               | 0             | 24259 ± 211                                                           | 54 ± 45                                          | 99.8 ± 1.3                                     |
|                               | 65            | 24164 ± 225                                                           | 448 ± 40                                         | 98.1 ± 1.2                                     |
| PAN                           | 0             | 7575 ± 93                                                             | 58 ± 130                                         | 99.2 ± 2.4                                     |
| N <sub>2</sub> O <sub>5</sub> | 0             | 4179 ± 230                                                            | 5 ± 48                                           | 99.9 ± 7.8                                     |
| HONO                          | 46            | 10000 ± 61                                                            | 1521 ± 47                                        | 84.8 ± 0.9                                     |
| ClNO <sub>2</sub>             | 60            | 2068 ± 103                                                            | 521 ± 141                                        | 74.8 ± 9.2                                     |

Mixing ratios (reference determined in heated inlet with bypassed denuder), standard deviations ( $1\sigma$ ) during the averaging intervals and derived denuder removal efficiencies of various NO<sub>y</sub> species, as a function of RH and as presented graphically

5 in Fig. 6.  $R = (I_0 - I) / I_0$ .  $\Delta R$  was determined by error propagation.
